# Supplementary material for: Machine Learning and Canine Chronic Enteropathies: A New Approach to Investigate FMT Effects
Source: Vet Sci. 2022 Sep 13;9(9):502. doi: 10.3390/vetsci9090502 (PMC9505216; doi:10.3390/vetsci9090502)
Supplement: Supplementary file 1 [file vetsci-09-00502-s001.zip]

Archive with 10 entries (10 files):
- a-Figure_S1.pdf
- a-Figure_S2.jpg
- a-Figure_S3.pdf
- a-Figure_S4.pdf
- a-Figure_S5.pdf
- a-Figure_S6.pdf
- a-Figure_S7.pdf
- a-Table_S1.xlsx
- a-Table_S2.xlsx
- a-Table_S3.xlsx
