# Supplementary material for: Machine Learning and Canine Chronic Enteropathies: A New Approach to Investigate FMT Effects
Source: Vet Sci. 2022 Sep 13;9(9):502. doi: 10.3390/vetsci9090502 (PMC9505216; doi:10.3390/vetsci9090502)
Supplement: Supplementary file 1 [file vetsci-09-00502-s001.zip › a-Table_S1.xlsx]

## Sheet: Foglio1
Table S1: Random forest (RF) performance metrics. RF model was run at species level on a test set of 54 subjects.
Accuracy : 0.9815
95% CI : (0.9011, 0.9995)
No Information Rate : 0.6296
P-Value [Acc > NIR] : 4.635e-10
Kappa : 0.9607
Mcnemar's Test P-Value : 1
Sensitivity : 1.0000
Specificity : 0.9706
Pos Pred Value : 0.9524
Neg Pred Value : 1.0000
Prevalence : 0.3704
Detection Rate : 0.3704
Detection Prevalence : 0.3889
Balanced Accuracy : 0.9853
