# Supplementary figures and images for: Machine Learning and Canine Chronic Enteropathies: A New Approach to Investigate FMT Effects
Source: MDPI journal article supplement (doi:10.3390/vetsci9090502), 2022-09-13

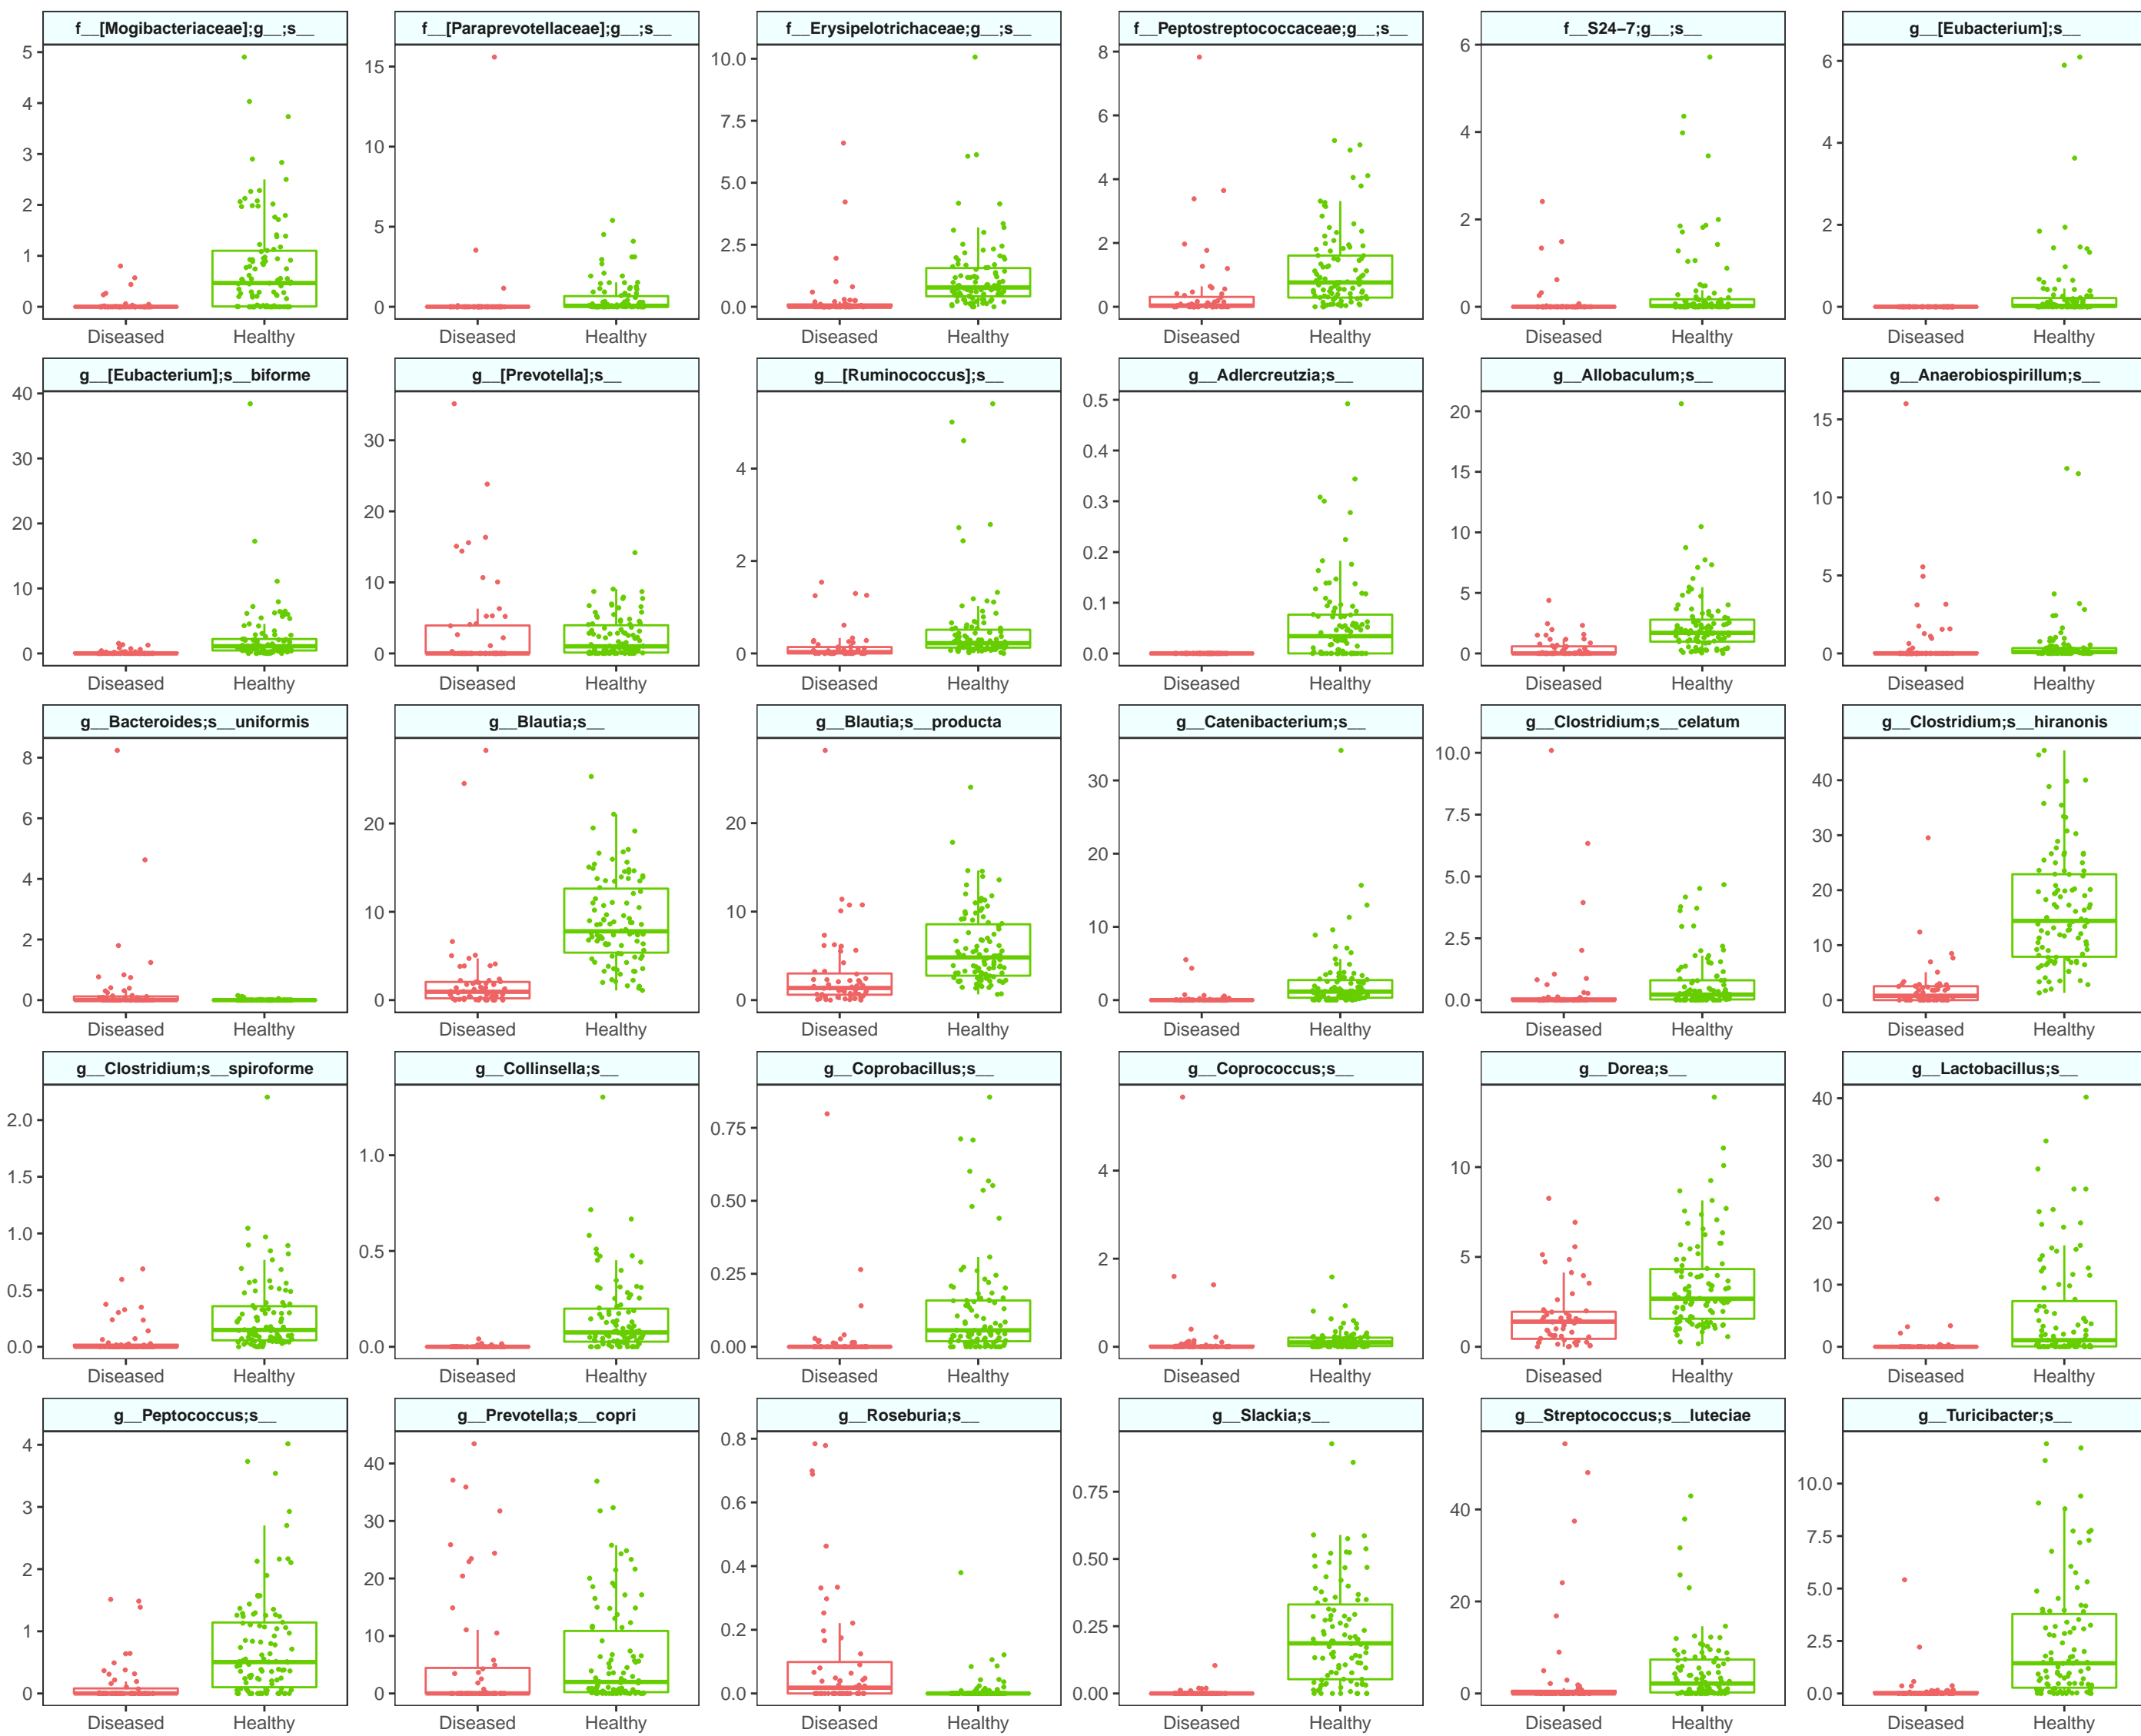

Supplement: s1 [file s1]

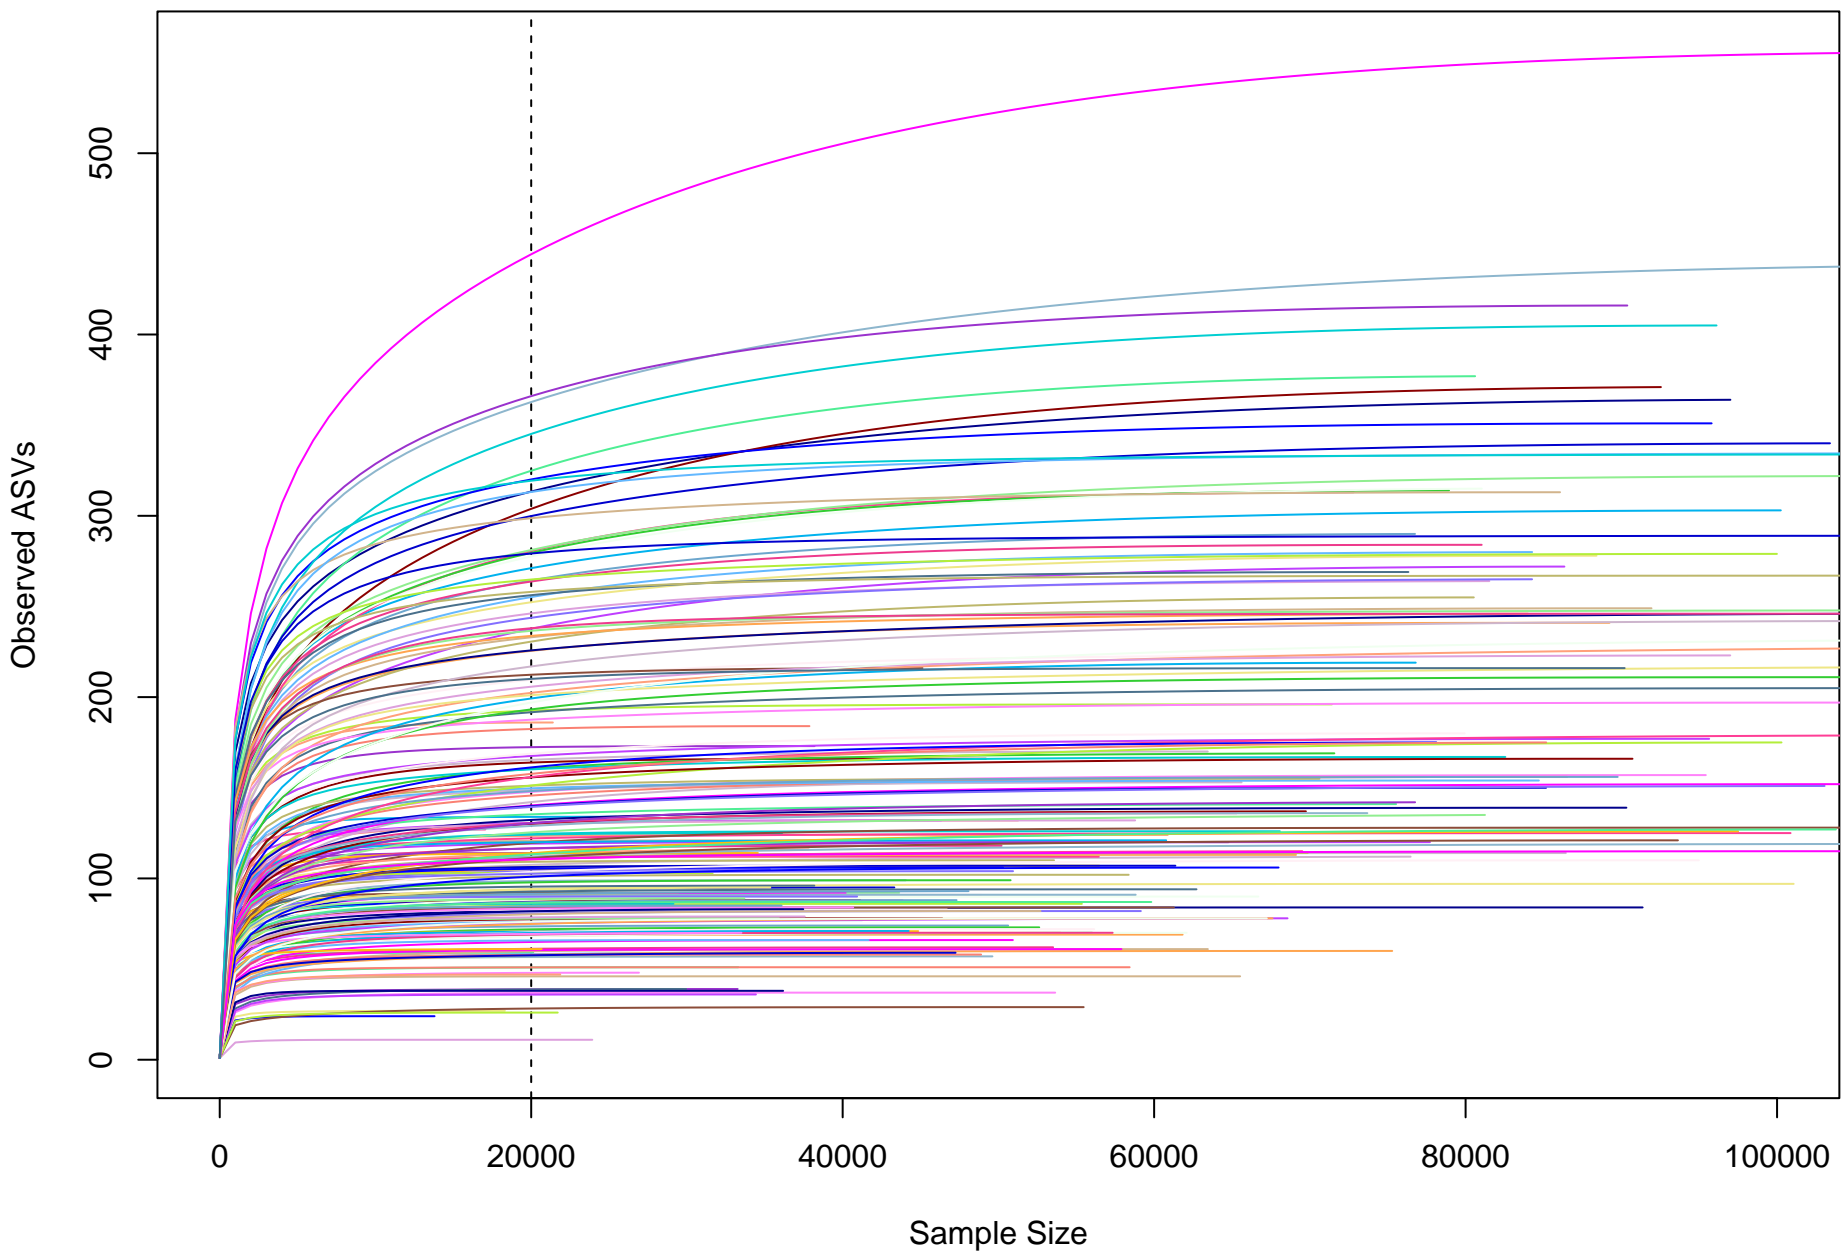

Supplement: s1 [file s1]

Aldex2

ANCOMBC

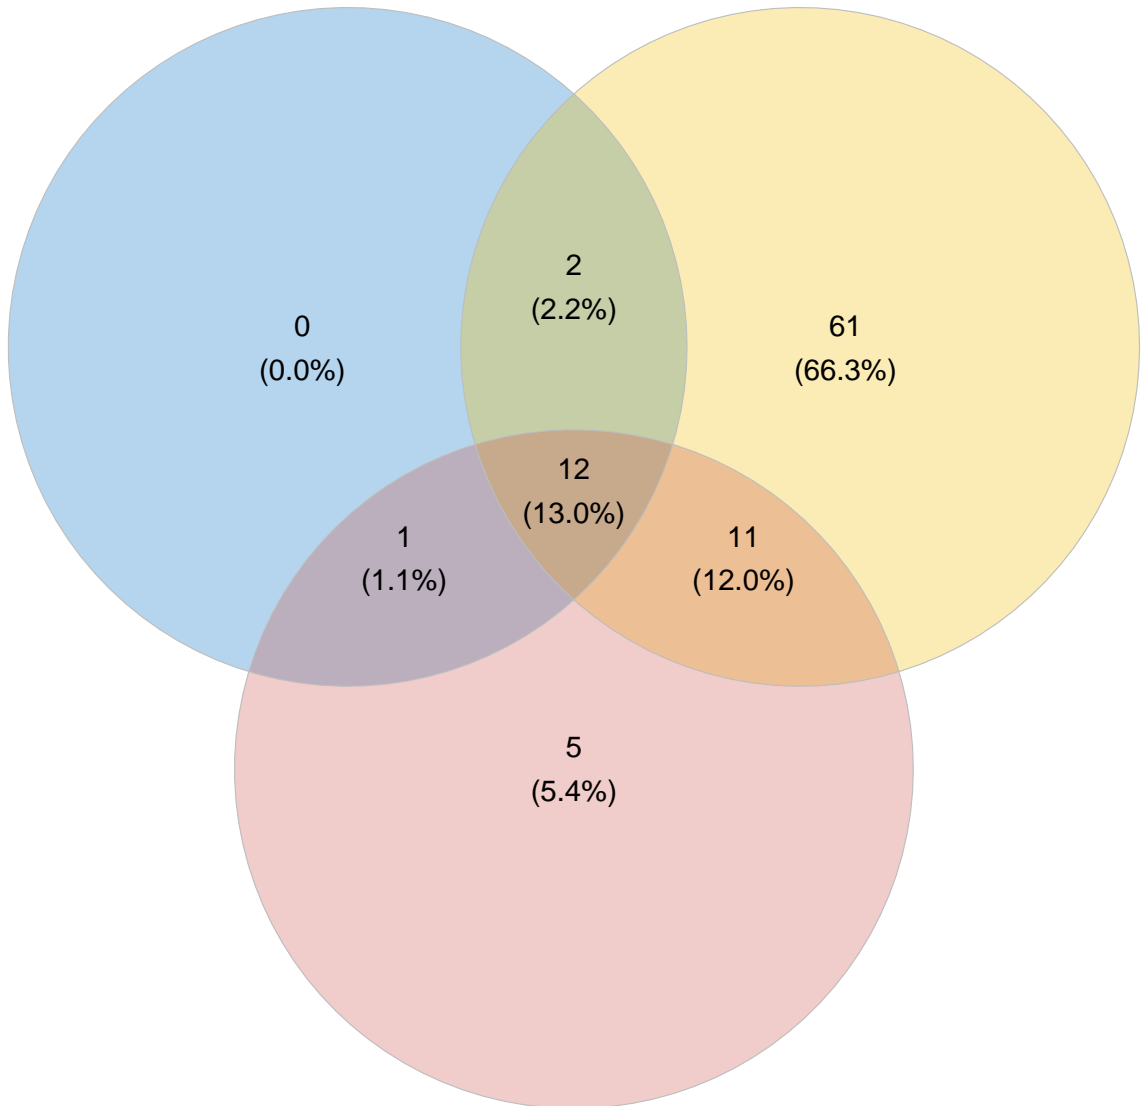

MaAsLin2

Supplement: s1 [file s1]

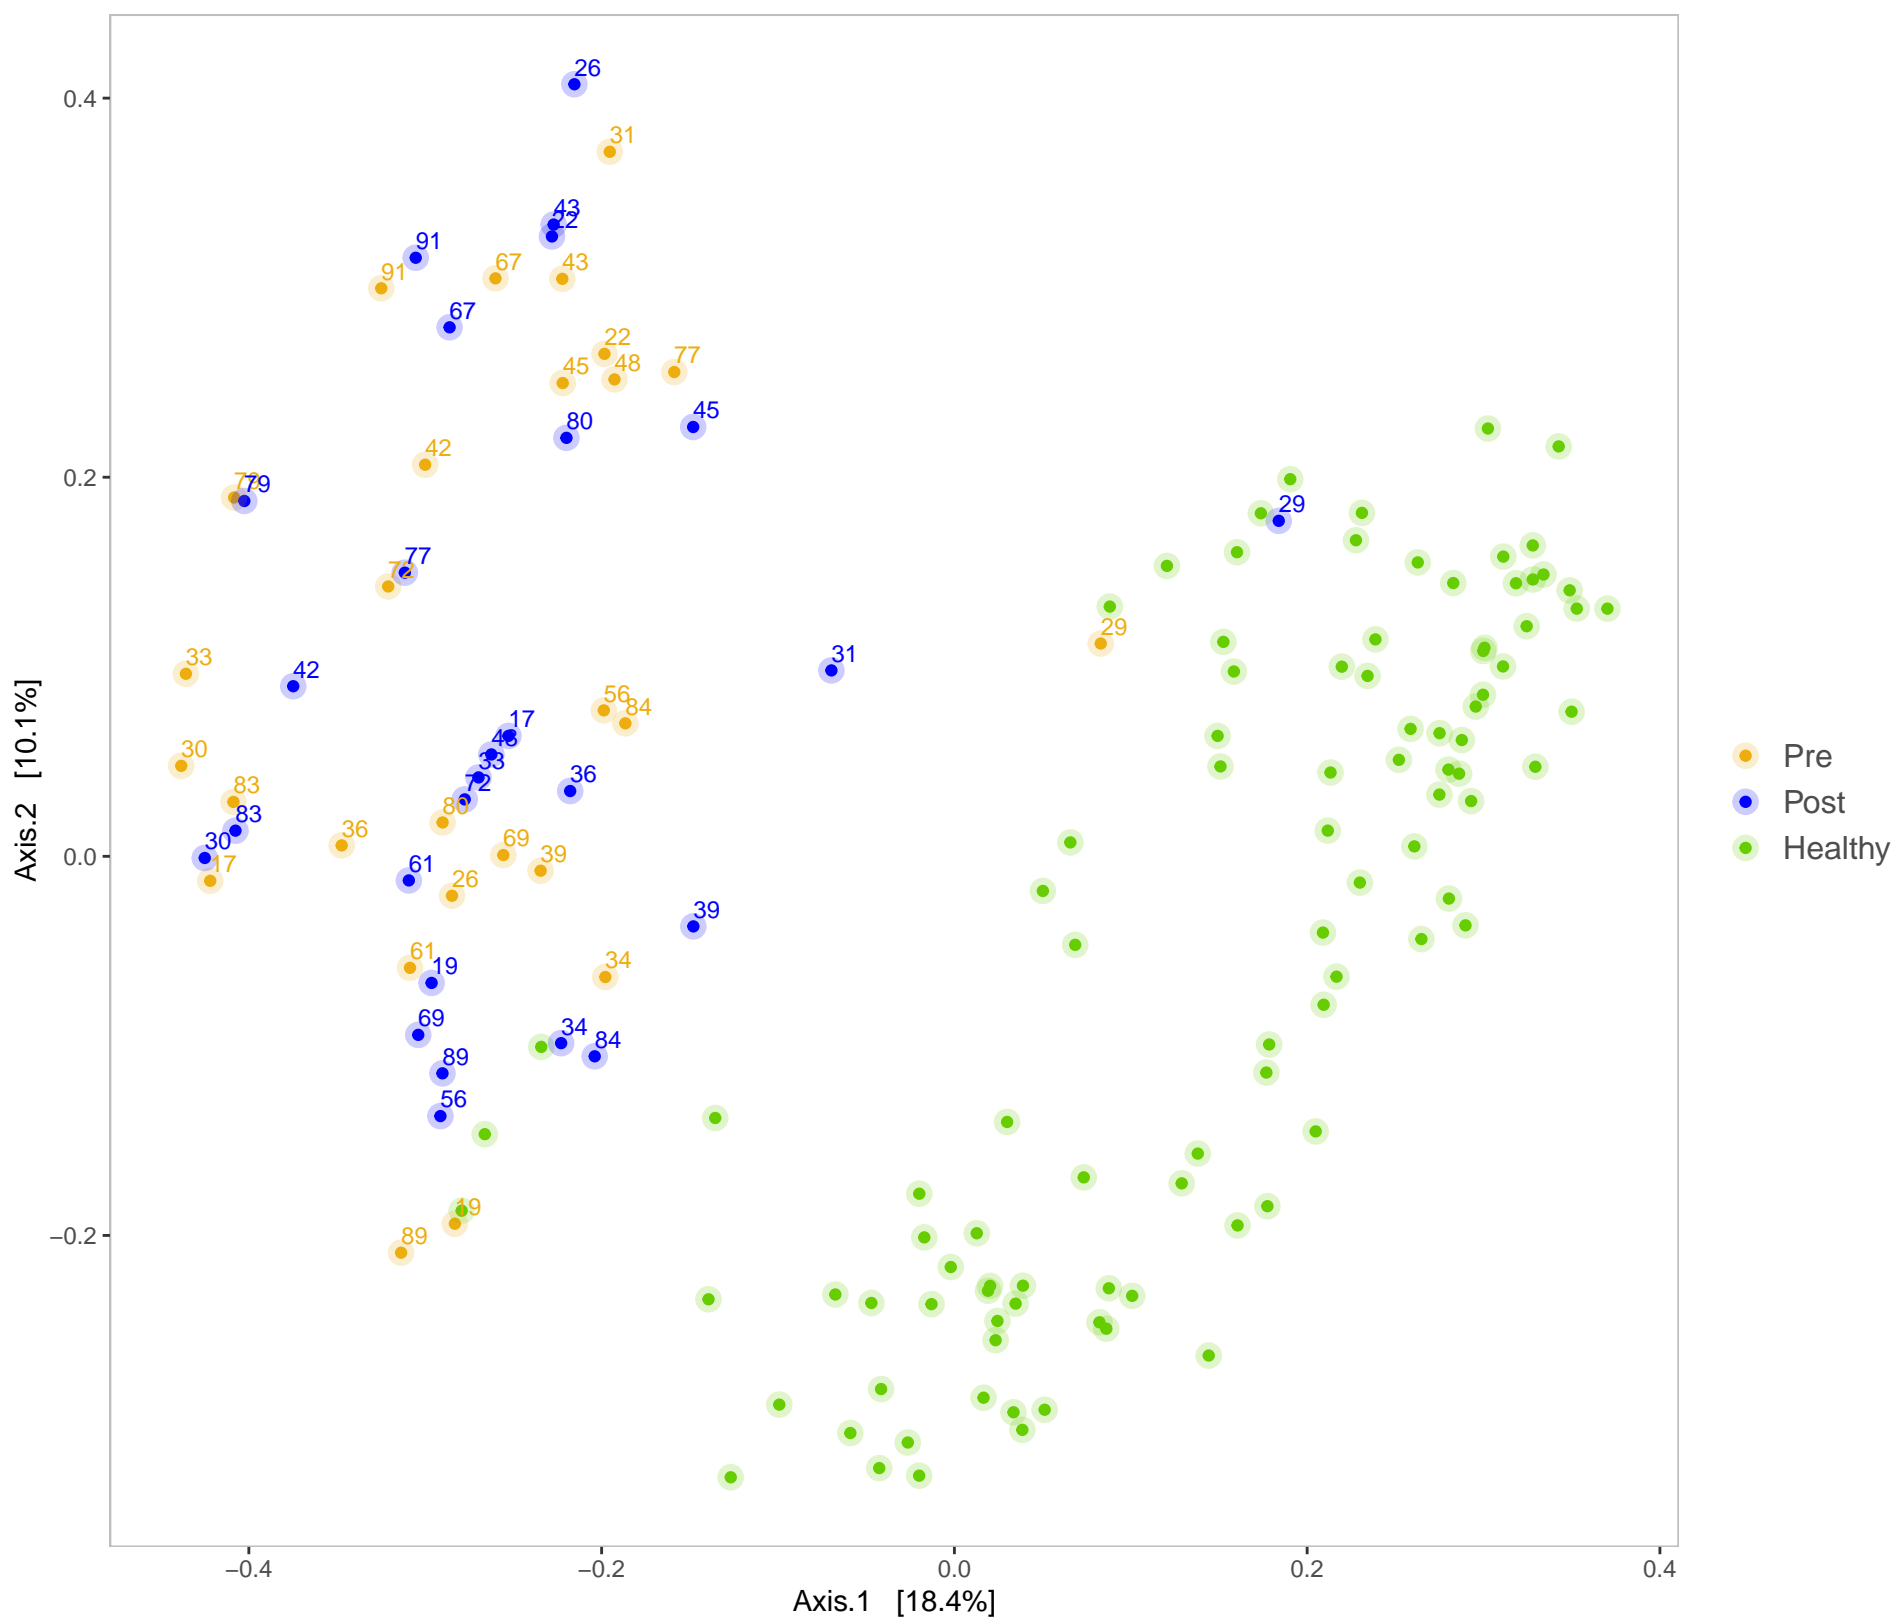

Supplement: s1 [file s1]

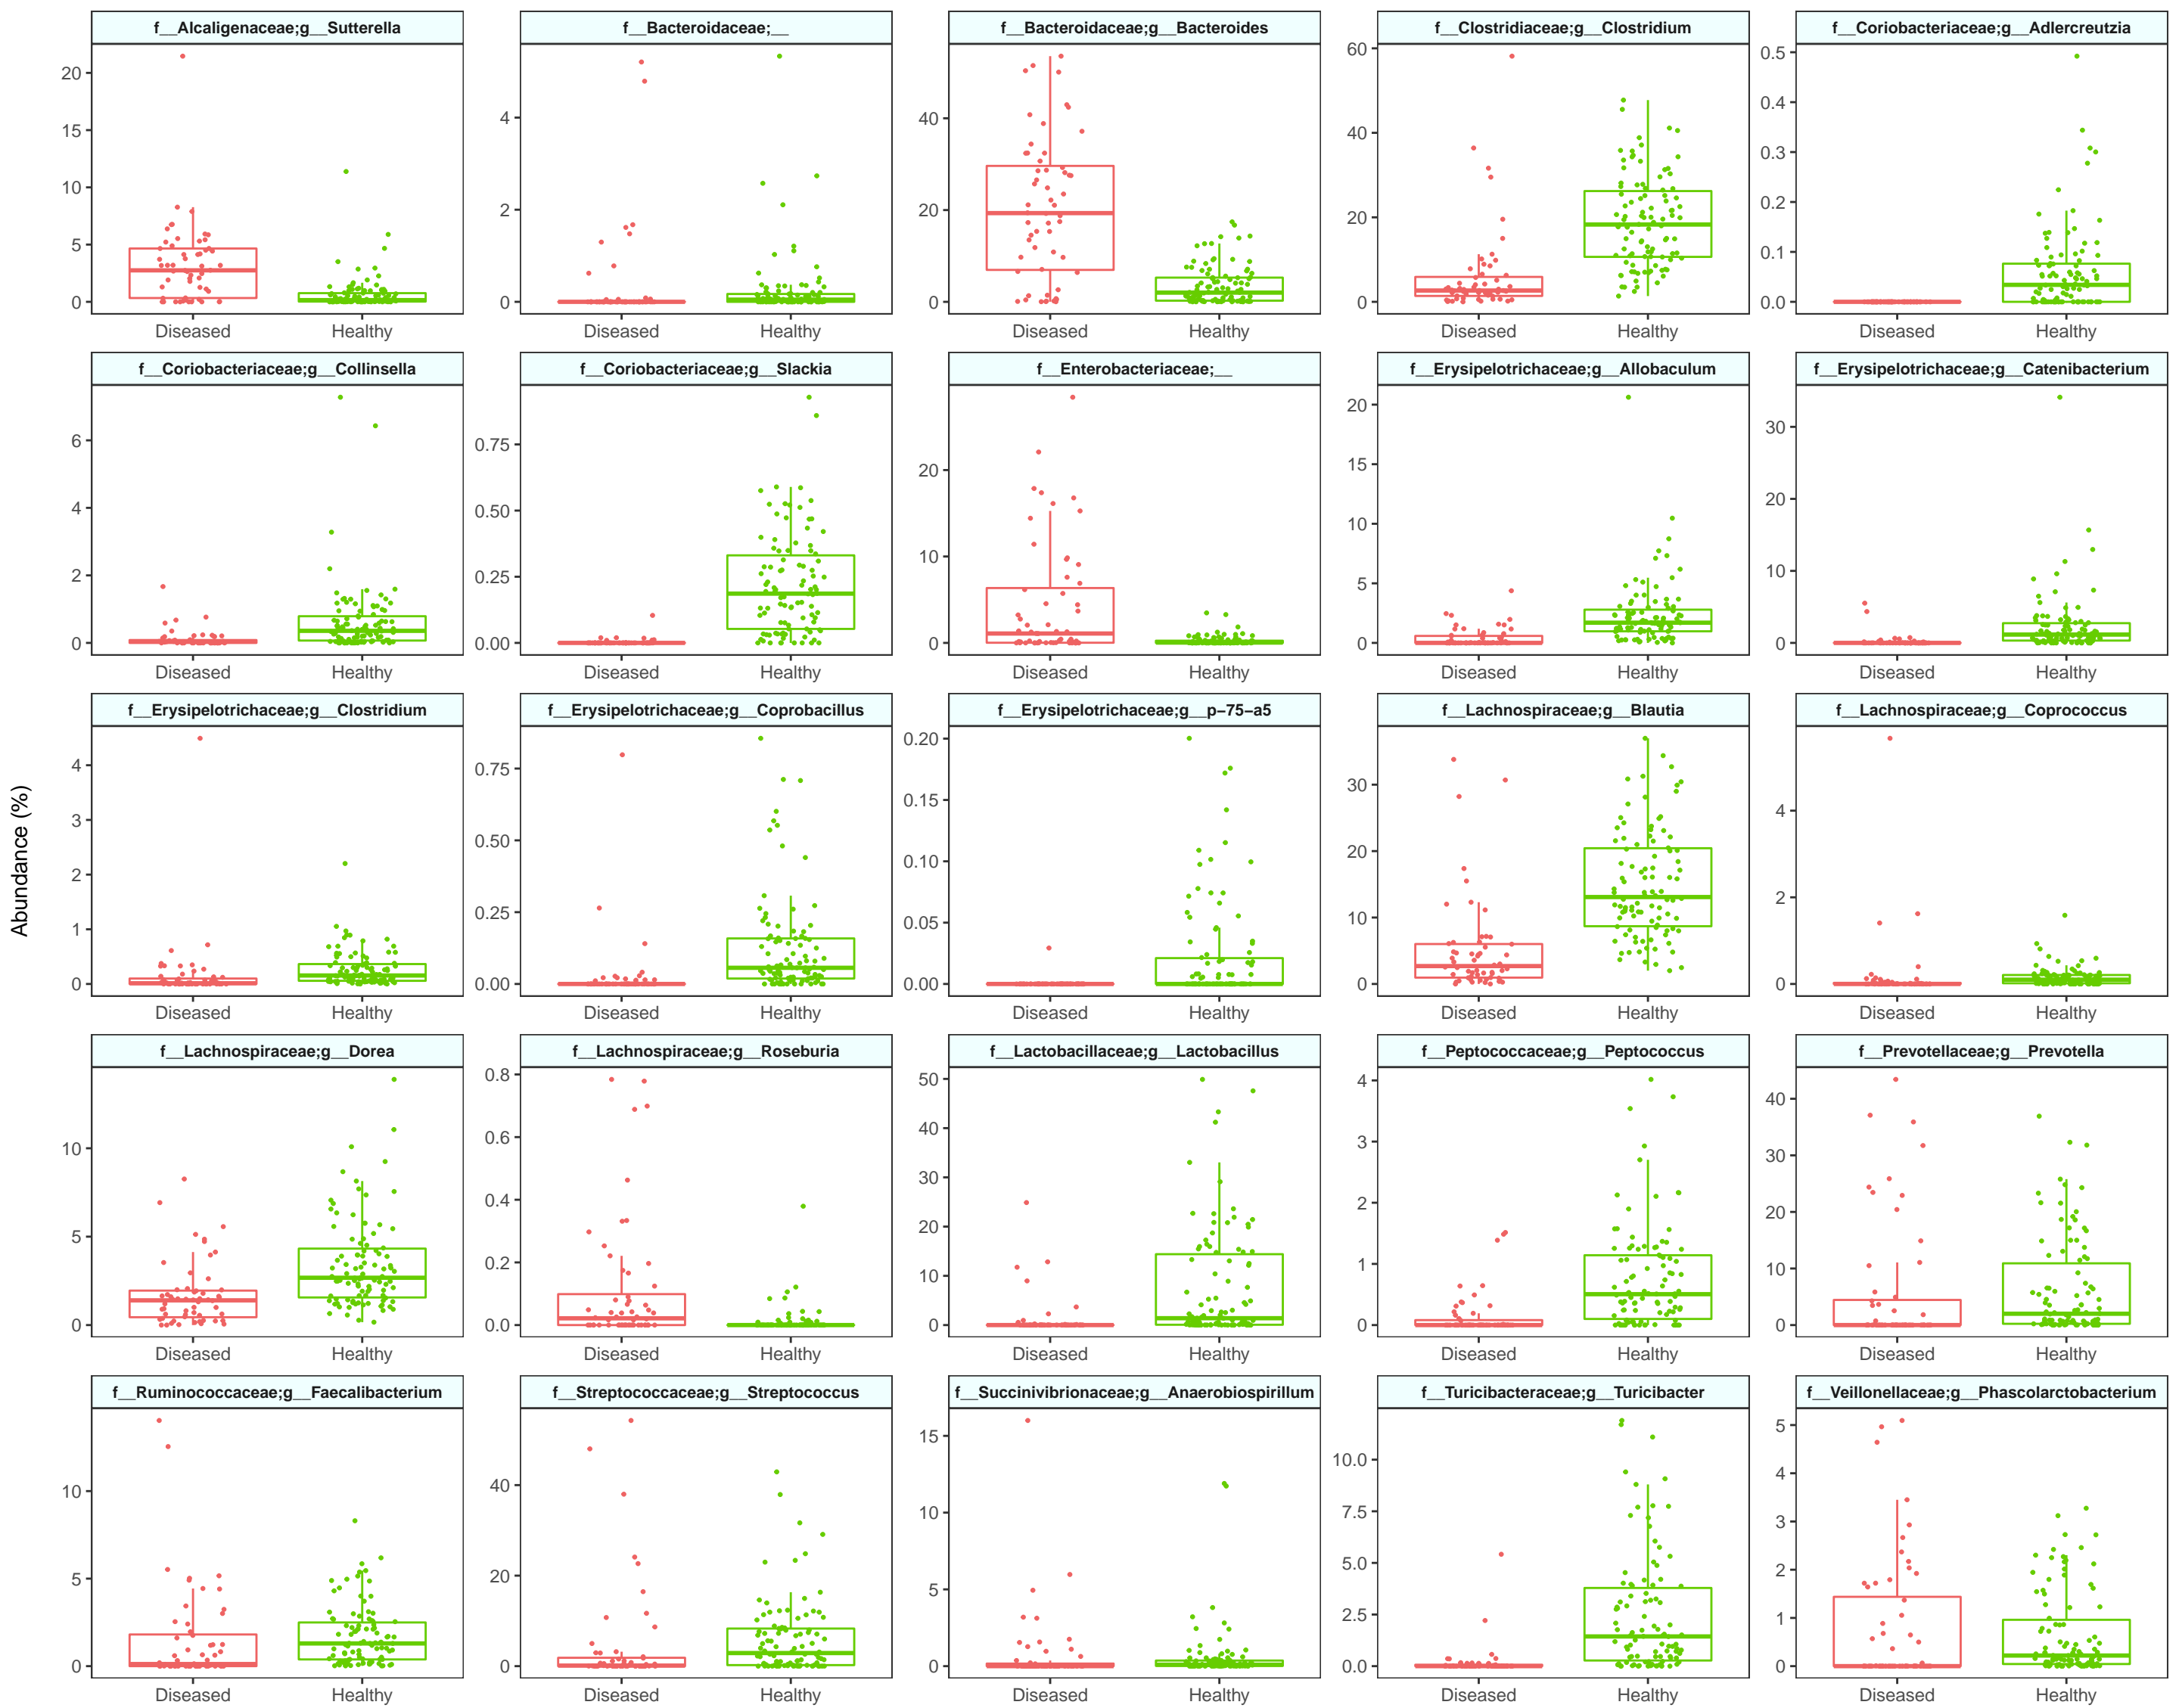

Supplement: s1 [file s1]

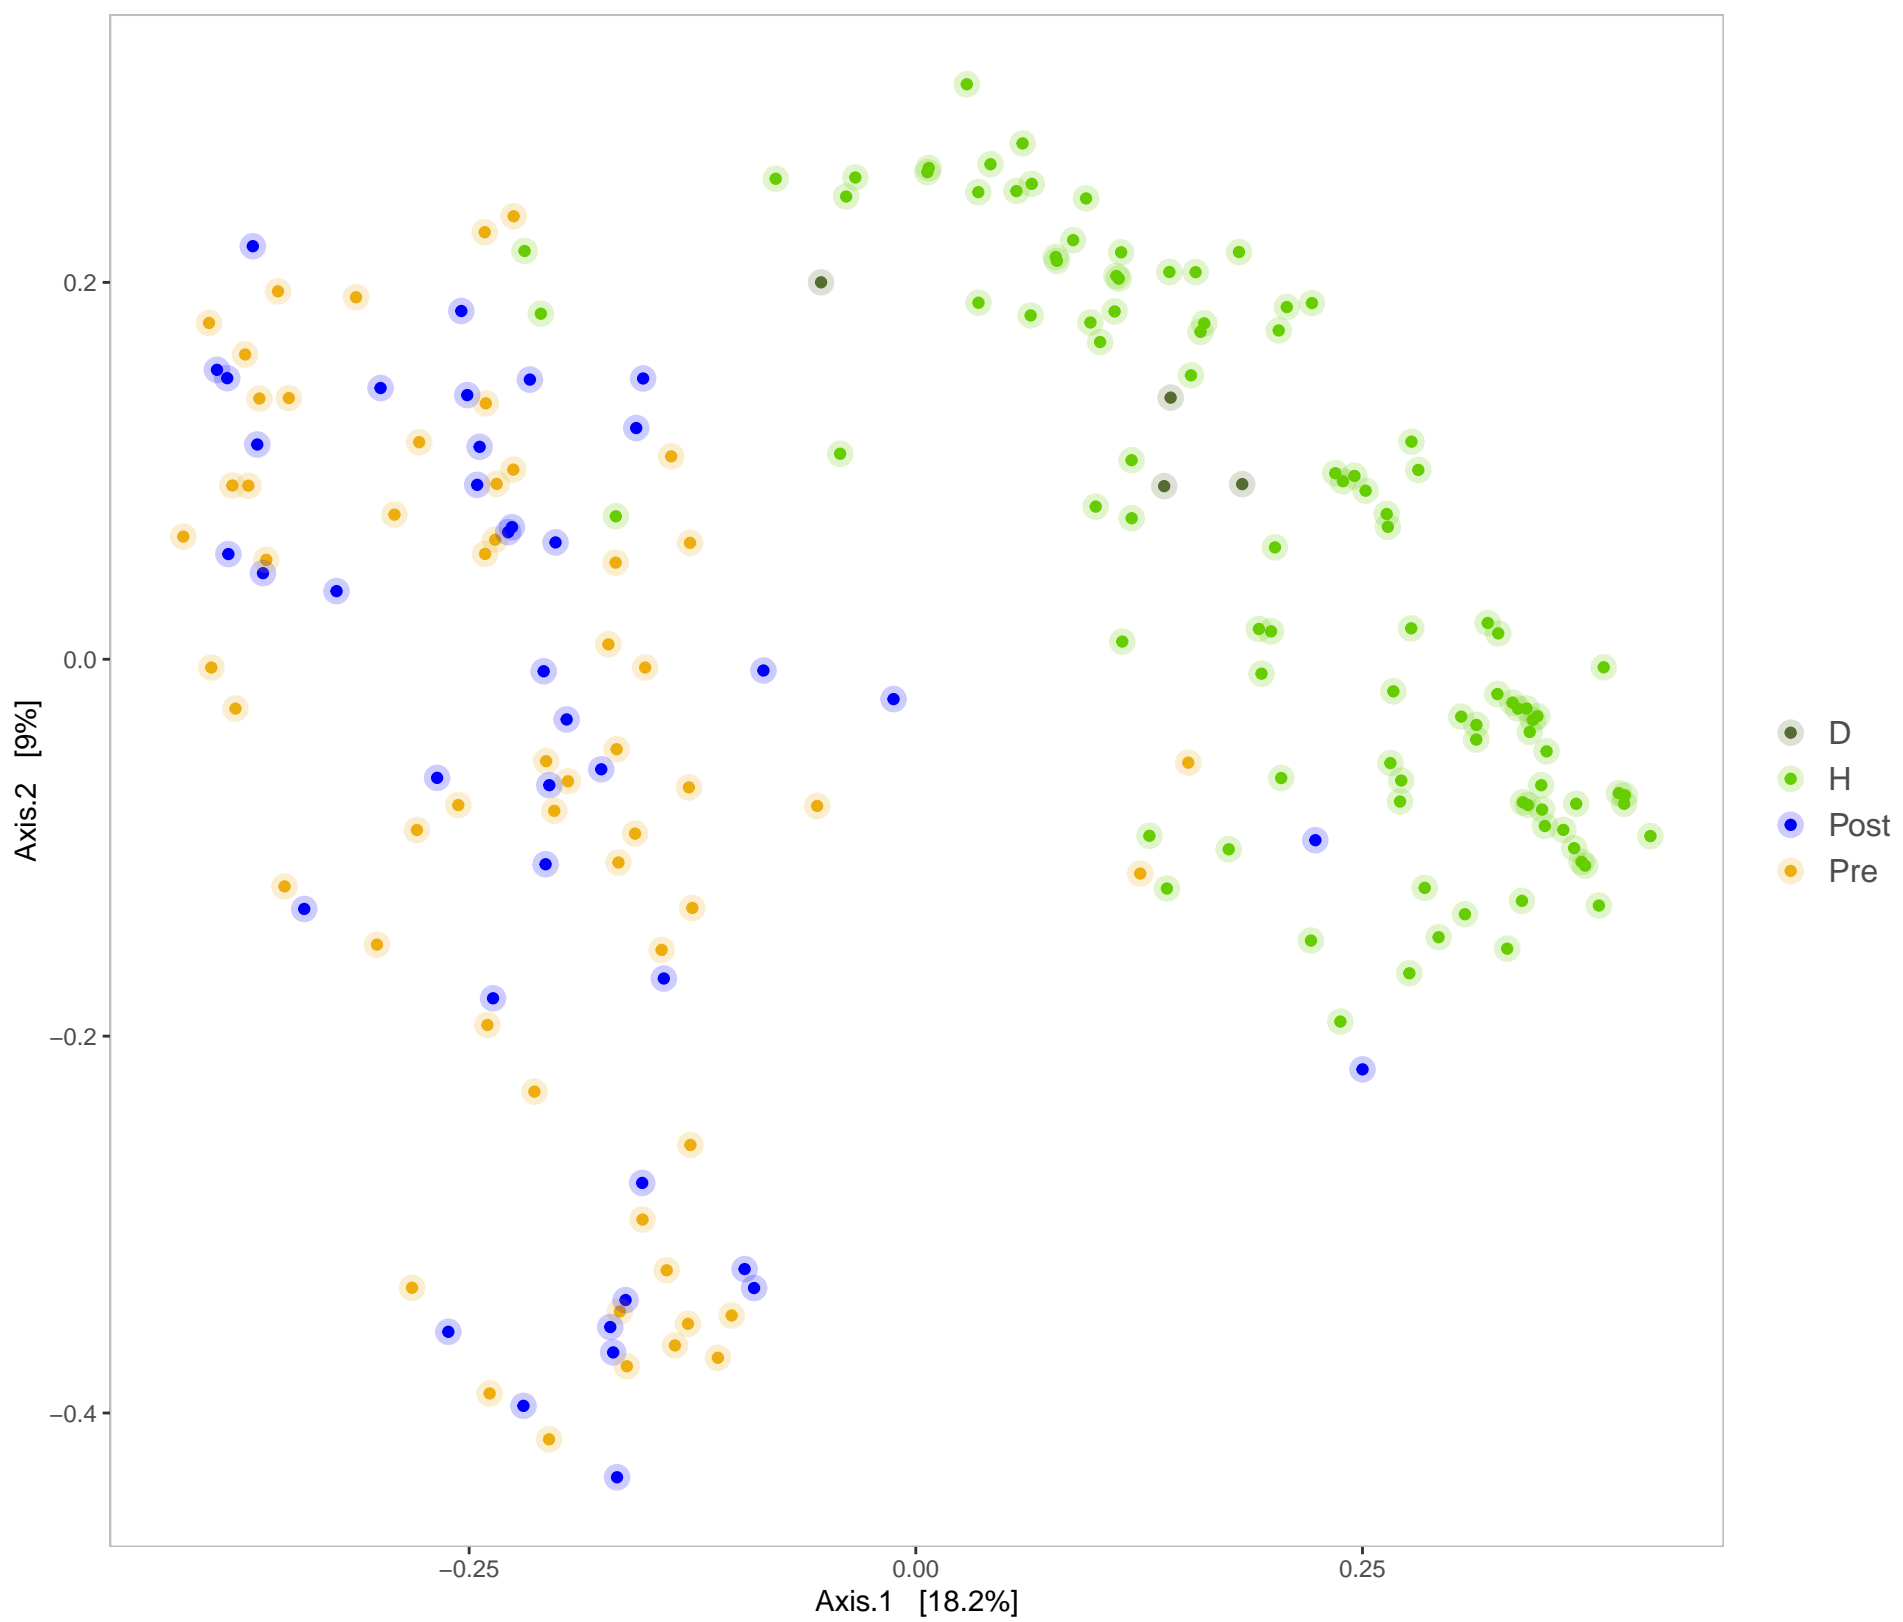

Supplement: s1 [file s1]
